# Supplementary material for: Zircons from Collisional Granites, Garhwal Himalaya, NW India: U–Th–Pb Age, Geochemistry and Protolith Constraints
Source: MDPI journal article supplement (doi:10.3390/min11101071), 2021-09-29
Supplement: s1 [file s1]

**Table S1.** Whole-rock geochemistry of granite samples (major elements in wt. % and trace elements in ppm).

| Sample Name                    | TG17-01 | TG17-04 |
|--------------------------------|---------|---------|
| SiO <sub>2</sub>               | 73.42   | 75.34   |
| TiO <sub>2</sub>               | 0.2     | 0.12    |
| Al <sub>2</sub> O <sub>3</sub> | 13.23   | 12.76   |
| Fe <sub>2</sub> O <sub>3</sub> | 1.1     | 0.85    |
| FeO                            | 0.86    | 0.72    |
| MnO                            | 0.011   | 0.08    |
| MgO                            | 1.08    | 0.89    |
| CaO                            | 0.36    | 0.29    |
| Na <sub>2</sub> O              | 1.06    | 2.47    |
| K <sub>2</sub> O               | 6.25    | 4.82    |
| P <sub>2</sub> O <sub>5</sub>  | 0.23    | 0.2     |
| H <sub>2</sub> O               | 0.59    | 0.36    |
| LOI                            | 1.23    | 1.14    |
| A/CNK                          | 1.44    | 1.30    |
| Cr                             | 8.54    | 8.24    |
| Ni                             | 6.44    | 3.85    |
| Co                             | 162.20  | 172.10  |
| Sc                             | 13.86   | 5.01    |
| V                              | 37.95   | 13.29   |
| Cu                             | 5.07    | 7.41    |
| Pb                             | 13.19   | 14.71   |
| Zn                             | 29.69   | 19.99   |
| Bi                             | 0.71    | 0.34    |
| Sn                             | 16.42   | 45.76   |
| W                              | 628.10  | 858.20  |
| Sb                             | 0.66    | 0.23    |
| Rb                             | 332.40  | 265.30  |
| Cs                             | 8.49    | 7.06    |
| Ba                             | 207.90  | 106.70  |
| Sr                             | 18.25   | 13.83   |
| Tl                             | 1.51    | 1.19    |
| Ga                             | 20.03   | 18.32   |
| Li                             | 19.81   | 14.70   |
| Ta                             | 1.75    | 1.87    |
| Nb                             | 13.20   | 9.24    |
| Hf                             | 4.12    | 3.60    |
| Zr                             | 141.10  | 101.90  |
| Ti                             | 1406.00 | 1019.00 |
| Y                              | 39.12   | 42.97   |
| Th                             | 28.25   | 30.95   |
| Be                             | 3.24    | 2.04    |
| P                              | 618.70  | 591.80  |
| Mn                             | 85.84   | 76.76   |

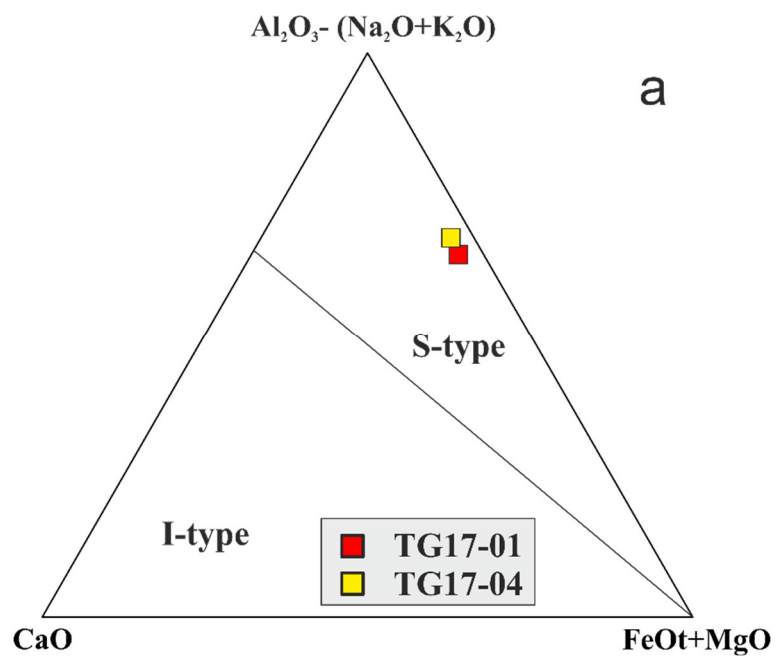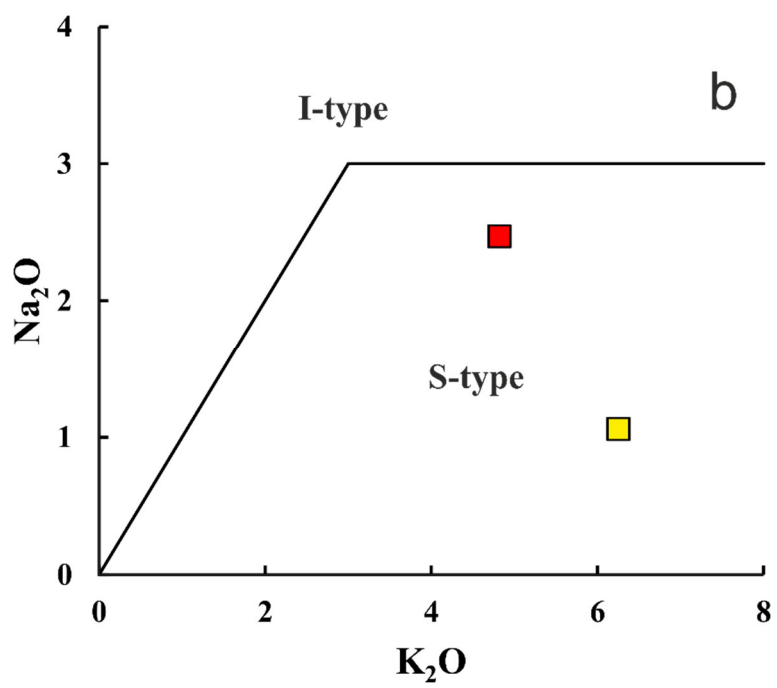

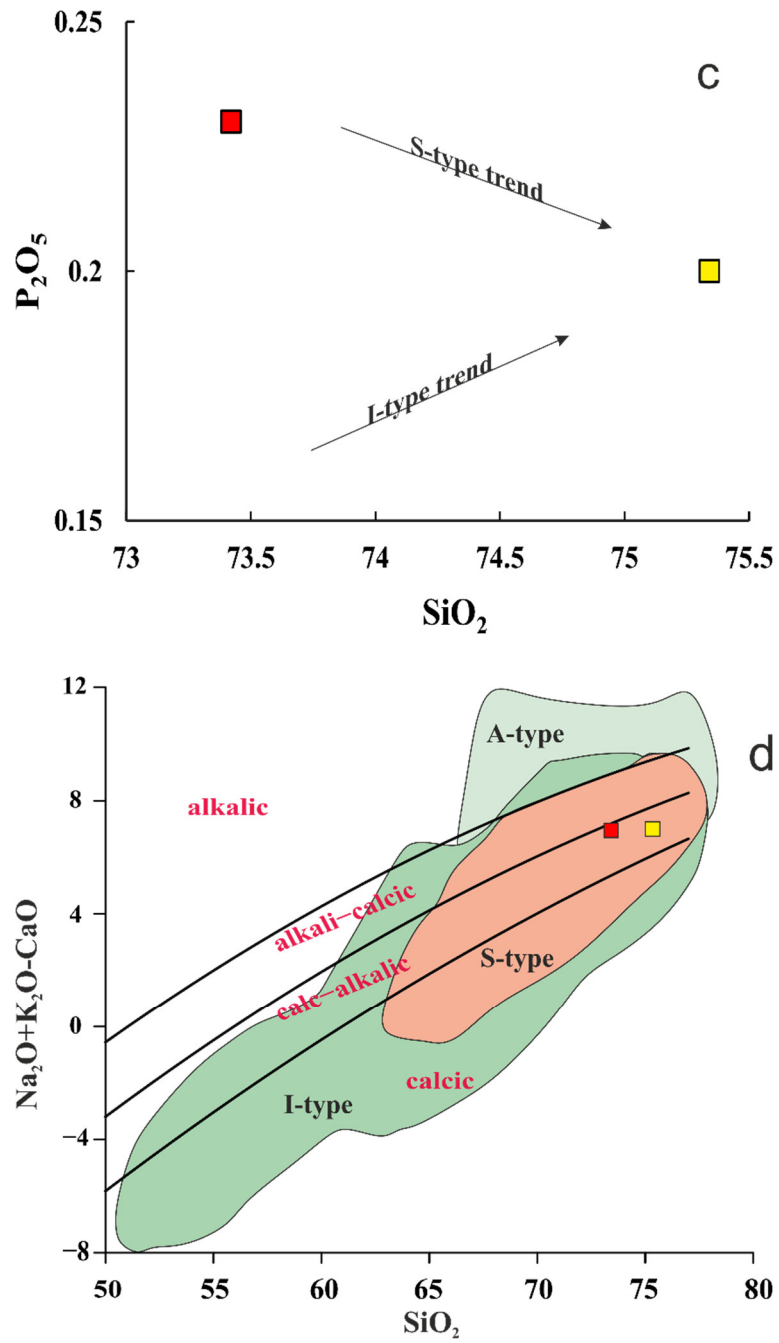

**Figure S1.** Various chemical discrimination diagrams for granites of Lesser Garhwal Himalaya. (a) A–C–F diagram [29] Chappell and White 1992). (b)  $\text{Na}_2\text{O}$  versus  $\text{K}_2\text{O}$  diagram [30] (c)  $\text{SiO}_2$  versus  $\text{P}_2\text{O}_5$  diagram [29] (d)  $\text{SiO}_2$  versus  $\text{Na}_2\text{O} + \text{K}_2\text{O} - \text{CaO}$  diagrams (the data for composition fields is from Lachlan Fold Belt)[31].

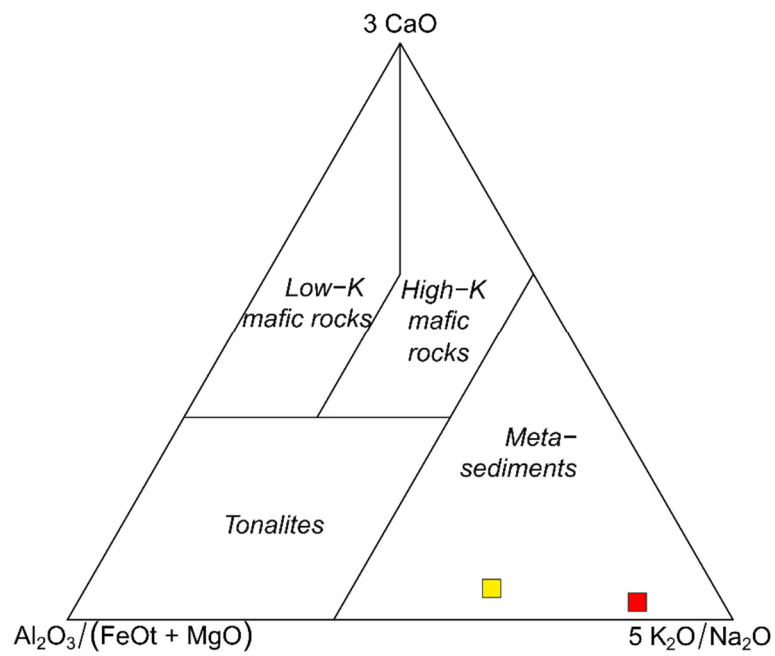

Figure S2. Source discrimination diagram for granites after [32].

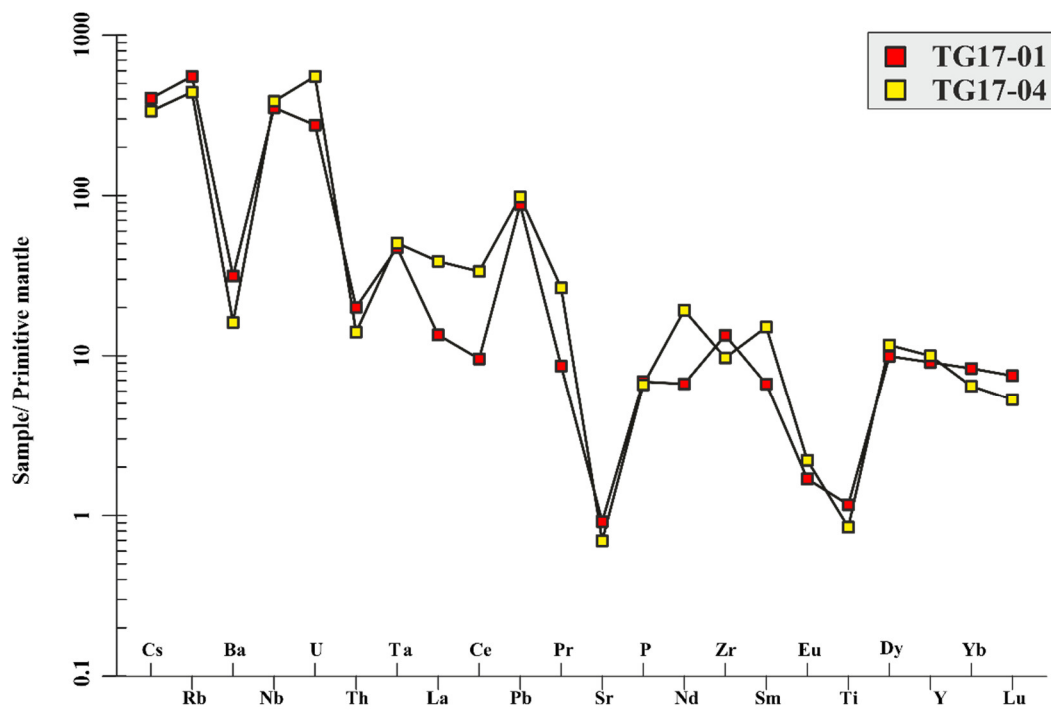

Figure S3. Primitive mantle-normalized trace elements patterns of the granites [33].

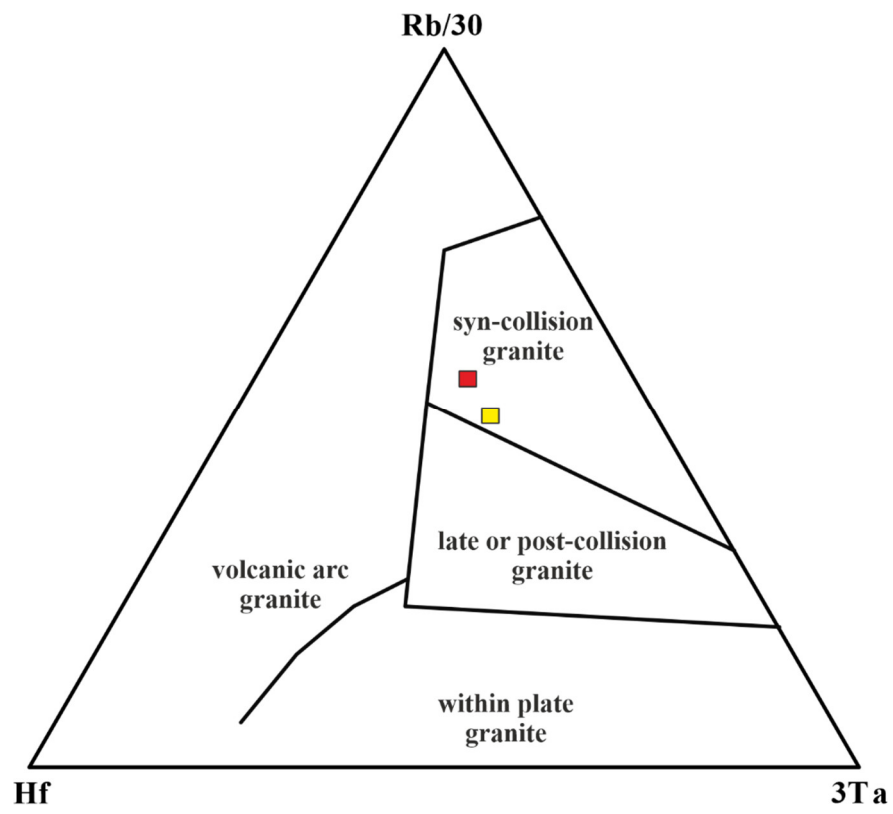

Figure S4. Hf-Rb-Ta discrimination diagram [34].

**Table S2.** Average content (610av, 612av, 614av) and standard deviation (SD) of trace elements in reference materials NIST SRM 610, 612, 614 (#610, #612, #614) during measurements. The accepted maintenance of trace elements in reference materials #610, #612, #614 on [42].

|       | La     | Ce     | Pr     | Nd     | Sm     | Eu     | Gd     | Tb     | Dy     | Ho     | Er     | Tm     | Yb     | Lu     | Ti     | Y      |
|-------|--------|--------|--------|--------|--------|--------|--------|--------|--------|--------|--------|--------|--------|--------|--------|--------|
| 610av | 458.39 | 448.75 | 430.66 | 431.76 | 450.71 | 462.40 | 419.94 | 443.68 | 427.36 | 450.13 | 426.14 | 420.71 | 461.56 | 435.37 | 436.50 | 451.18 |
| SD    | 11.7   | 12     | 11.6   | 11.6   | 11.1   | 12.1   | 10.1   | 11.4   | 11.2   | 11.3   | 10.3   | 11     | 10.9   | 11.3   | 14.19  | 7.9    |
| #610  | 457    | 448    | 430    | 431    | 451    | 461    | 444    | 443    | 427    | 449    | 426    | 420    | 445    | 435    | 434    | 450    |
| 612av | 36.46  | 36.95  | 35.51  | 34.74  | 36.56  | 35.44  | 34.58  | 36.67  | 34.17  | 37.16  | 35.32  | 34.99  | 38.65  | 35.61  | 37.90  | 36.93  |
| SD    | 2.6    | 2.8    | 2.5    | 2.8    | 2.6    | 2.7    | 2.9    | 2.8    | 2.8    | 2.8    | 3      | 2.9    | 2.8    | 2.8    | 3.3    | 2.7    |
| #612  | 35.8   | 38.7   | 37.2   | 35.9   | 38.1   | 35     | 36.7   | 36     | 36     | 38     | 38     | 38     | 39.2   | 36.9   | 44     | 38     |
| 614av | 0.57   | 0.61   | 0.57   | 0.62   | 0.57   | 0.64   | 0.58   | 0.57   | 0.55   | 0.61   | 0.53   | 0.54   | 0.55   | 0.56   | 2.37   | 0.61   |
| SD    | 0.05   | 0.06   | 0.05   | 0.1    | 0.1    | 0.05   | 0.09   | 0.06   | 0.09   | 0.06   | 0.05   | 0.06   | 0.09   | 0.04   | 0.5    | 0.1    |
| #614  | 0.72   | 0.81   | 0.76   | 0.74   | 0.75   | 0.76   | 0.75   | 0.73   | 0.74   | 0.74   | 0.74   | 0.73   | 0.77   | 0.73   | 3.4    | 0.8    |

**Table S3** Calculations of REE and Y in TG17-01 granites, based on data on their concentrations in Paleoproterozoic zircons.

|           | <b>D<sub>1</sub></b> | <b>D<sub>2</sub></b> | <b>Zr<sub>av</sub></b> | <b>Gr<sub>c1</sub></b> | <b>Gr<sub>c2</sub></b> | <b>Granite01</b> |
|-----------|----------------------|----------------------|------------------------|------------------------|------------------------|------------------|
| <b>Y</b>  | 149                  | 66                   | 7701                   | 51.68                  | 116.68                 | 39.12            |
| <b>La</b> |                      | 0.95                 | 9                      |                        | 9.30                   | 8.75             |
| <b>Ce</b> | 2.5                  | 1.6                  | 32                     | 12.65                  | 19.76                  | 16.02            |
| <b>Pr</b> |                      | 1.3                  | 8                      |                        | 6.44                   | 2.19             |
| <b>Nd</b> | 8.5                  | 1.9                  | 72                     | 8.47                   | 37.87                  | 8.33             |
| <b>Sm</b> | 16                   |                      | 84                     | 5.24                   |                        | 2.70             |
| <b>Eu</b> | 8.5                  | 13                   | 1                      | 0.08                   | 0.05                   | 0.26             |
| <b>Gd</b> | 30                   | 28                   | 259                    | 8.63                   | 9.25                   | 4.10             |
| <b>Tb</b> |                      |                      | 87                     |                        |                        |                  |
| <b>Dy</b> | 100                  |                      | 842                    | 8.42                   |                        | 6.69             |
| <b>Ho</b> |                      | 86                   | 246                    |                        | 2.87                   | 1.45             |
| <b>Er</b> | 214                  |                      | 907                    | 4.24                   |                        | 4.11             |
| <b>Tm</b> |                      |                      | 166                    |                        |                        |                  |
| <b>Yb</b> | 345                  | 83                   | 1421                   | 4.12                   | 17.11                  | 3.67             |
| <b>Lu</b> | 445                  | 105                  | 239                    | 0.54                   | 2.27                   | 0.51             |
| <b>Th</b> | 41                   | 13                   | 514                    | 12.54                  | 39.54                  | 28.25            |
| <b>U</b>  | 167                  | 20                   | 2147                   | 12.86                  | 107.35                 | 5.50             |

$$D_i = C^{Zr_i} / C^{m_i}$$

D<sub>1</sub> = D Zr/melt - Experimentally determined zircon/melt partition coefficient for element (i) at 800 °C, 20 Kbar [50]

D<sub>2</sub> = D Zr/melt - Experimentally determined zircon/melt partition coefficient at 800°C, 2 Kbar [83]

Zr<sub>av</sub> - average concentration elements in zircons from sample TG17-01 (tabl. 2)

Gr<sub>c1</sub> - calculated concentration elements (i) in granite:  $C^{Gr_{c1}_i} = C^{Zr_i} / D_1$

Gr<sub>c2</sub> - calculated concentration elements (i) in granite:  $C^{Gr_{c2}_i} = C^{Zr_i} / D_2$

Granite01 - natural concentration of elements in granite TG17-01

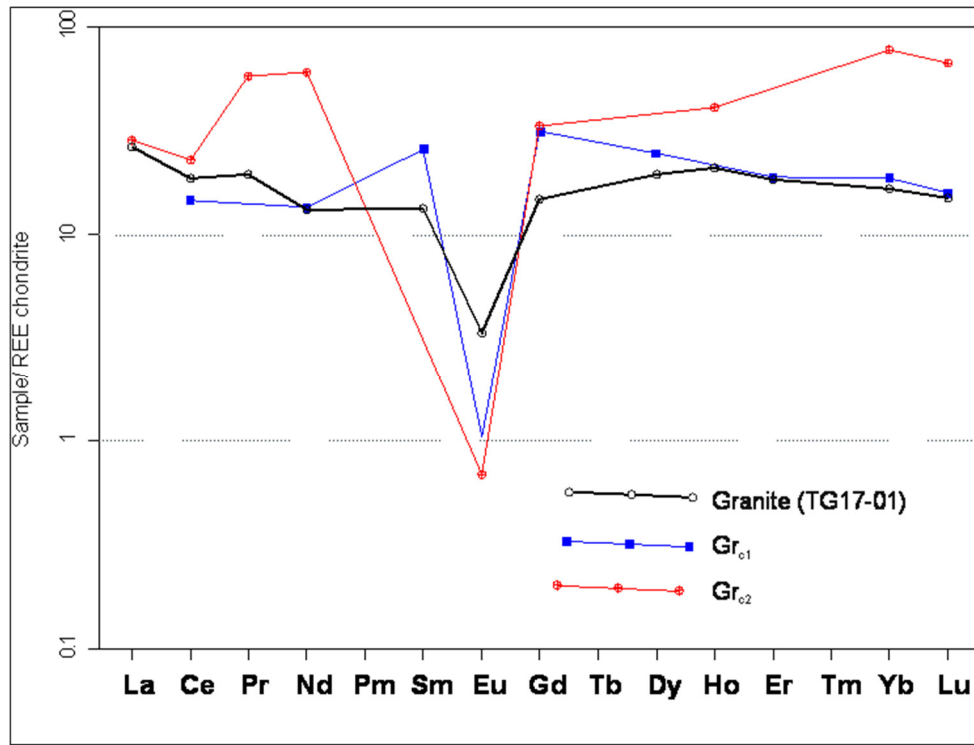

**Figure S5.** Chondrite-normalized [46] REE concentrations in granite TG17-01 and calculated REE concentrations based on zircon/melt partition coefficient for element Gr<sub>c1</sub> [50] and Gr<sub>c2</sub> [83].

**Table S4.** Calculations of REE and Y concentrations in TG17-04 Granites, based on data on their concentrations in Paleoproterozoic zircons.

|    | D <sub>1</sub> | D <sub>2</sub> | Zr <sub>av1800</sub> | Gr <sub>2c1</sub> | Gr <sub>2c2</sub> | Granite04 |
|----|----------------|----------------|----------------------|-------------------|-------------------|-----------|
| Y  | 149            | 66             | 4122.66              | 27.67             | 62.46             | 42.97     |
| La |                | 0.95           | 4.87                 |                   | 5.13              | 25.18     |
| Ce | 2.5            | 1.6            | 26.50                | 10.60             | 16.56             | 56.30     |
| Pr |                | 1.3            | 2.88                 |                   | 2.22              | 6.74      |
| Nd | 8.5            | 1.9            | 18.15                | 2.13              | 9.55              | 24.06     |
| Sm | 16             |                | 24.79                | 1.55              |                   | 6.14      |
| Eu | 8.5            | 13             | 6.25                 | 0.73              | 0.48              | 0.34      |
| Gd | 30             | 28             | 123.78               | 4.13              | 4.42              | 6.40      |
| Tb |                |                | 47.10                |                   |                   | 1.24      |
| Dy | 100            |                | 442.13               | 4.42              |                   | 7.86      |
| Ho |                | 86             | 130.89               |                   | 1.52              | 1.36      |
| Er | 214            |                | 501.75               | 2.34              |                   | 3.98      |
| Tm |                |                | 96.31                |                   |                   | 0.53      |
| Yb | 345            | 83             | 847.78               | 2.46              | 10.21             | 2.84      |
| Lu | 445            | 105            | 143.99               | 0.32              | 1.37              | 0.36      |
| Th | 41             | 13             | 267.81               | 6.53              | 20.60             | 30.95     |



|   |     |    |         |      |       |       |
|---|-----|----|---------|------|-------|-------|
| U | 167 | 20 | 1329.68 | 7.96 | 66.48 | 11.08 |
|---|-----|----|---------|------|-------|-------|

$$D_i = C^{Zr_i} / C^{m_i}$$

$D_1$  = D Zr/melt - Experimentally determined zircon/melt partition coefficient for element (i) at 800 °C, 20 Kbar [50]

$Zr_{av1800}$  - average concentration of elements in 1.8 Ga zircons from sample TG17-04 (tabl. 2))

$Gr_{c1}$  - calculated concentration elements (i) in granite:  $C^{Gr_{c1}_i} = C^{Zr_i} / D_1$

$Gr_{c2}$  - calculated concentration elements (i) in granite:  $C^{Gr_{c2}_i} = C^{Zr_i} / D_2$

Granite04 - natural concentration of elements in granite TG17-04

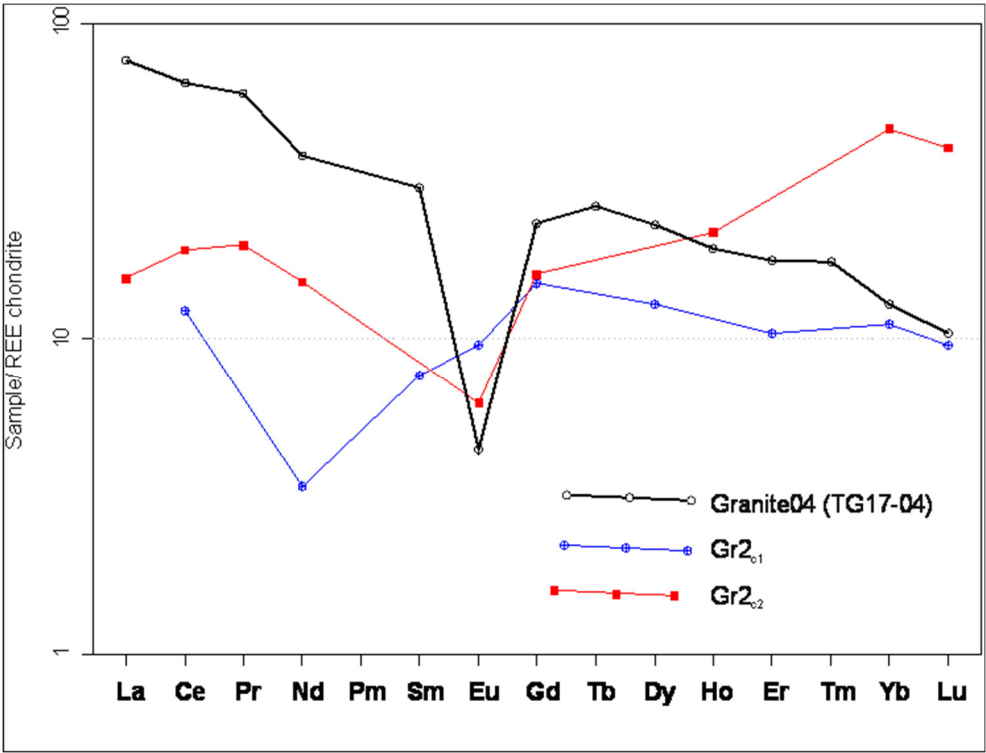

**Figure S6.** Chondrite-normalized [46] REE concentrations in granite TG17-04 and calculated REE concentrations based on zircon/melt partition coefficient for element  $Gr_{c1}$  [50] and  $Gr_{c2}$  [83].
